# Supplementary material for: A curated dataset of peste des petits ruminants virus sequences for molecular epidemiological analyses
Source: PubMed Central journal article supplement (PMC8830648; doi:10.1371/journal.pone.0263616), 2022-02-10
Supplement: pone.0263616.s006.pdf [file pone.0263616.s006.pdf]

**S1 Table. Corrections made to full PPRV genome sequences in the database**

Note that, in addition to these specific corrections, many sequences would have required additional gaps in the region between 4400 and 5500 to maintain the alignment (S1 Fig).

| <b>Sequence accession number</b> | <b>Full isolate name</b> | <b>Error position in original sequence</b> | <b>Correction made</b>                                |
|----------------------------------|--------------------------|--------------------------------------------|-------------------------------------------------------|
| KM089831                         | China/Zhumadian/2014     | 2498                                       | Remove "GGG" left from P mRNA editing                 |
| KM816619                         | China/Jilin/2014/GZL     | 4754                                       | Remove 2 repeats of bases 4702-4753 (104 bases total) |
| KP868655                         | China/Guangdong/2014     | 2498                                       | Remove "G" left from P mRNA editing                   |
| KP868655                         | China/Guangdong/2014     | 2427                                       | Insert gap to maintain reading frame                  |
| MN369542                         | India/Shahjadpur/2013    | 15939                                      | Remove "CAAGCT" not present in any other sequence     |
